# Supplementary material for: Hemodynamic effects of acute hyperoxia: systematic review and meta-analysis
Source: Springer Nature journal article supplement (doi:10.1186/s13054-018-1968-2), 2018-02-21

# Healthy volunteers

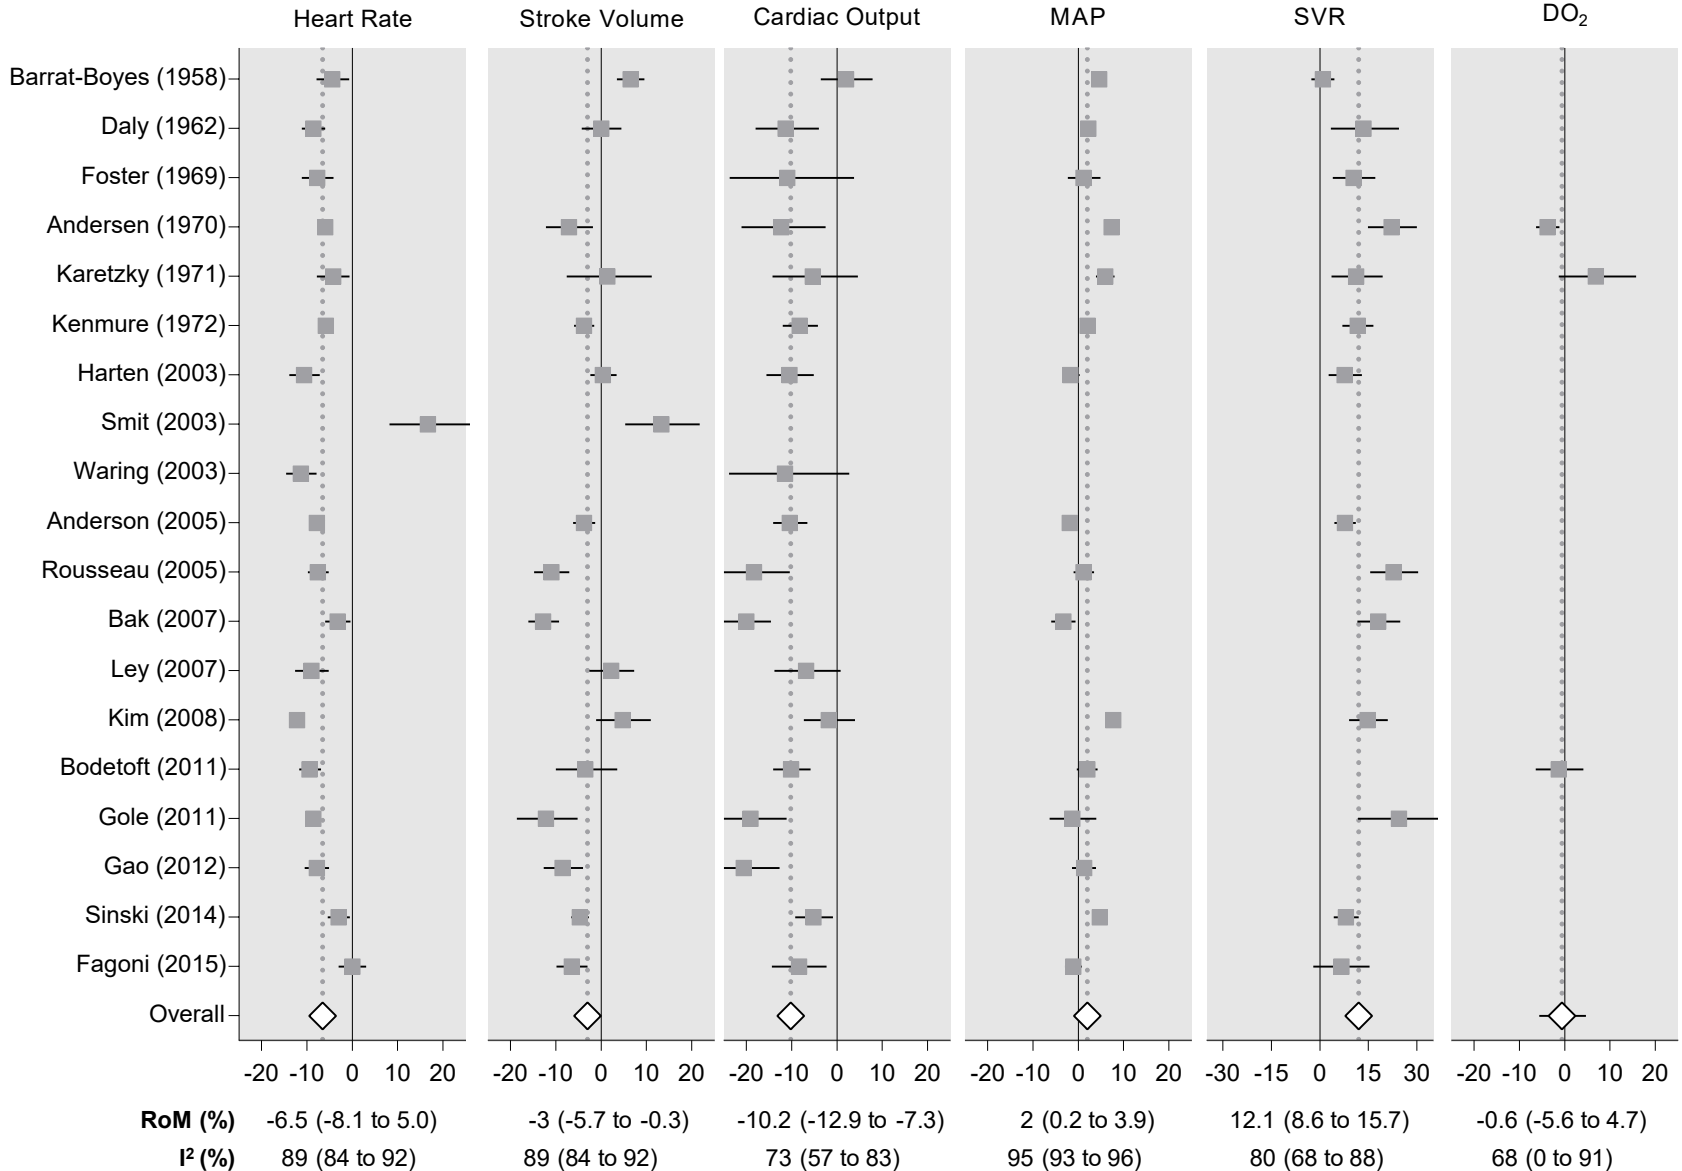

# Coronary Artery Disease

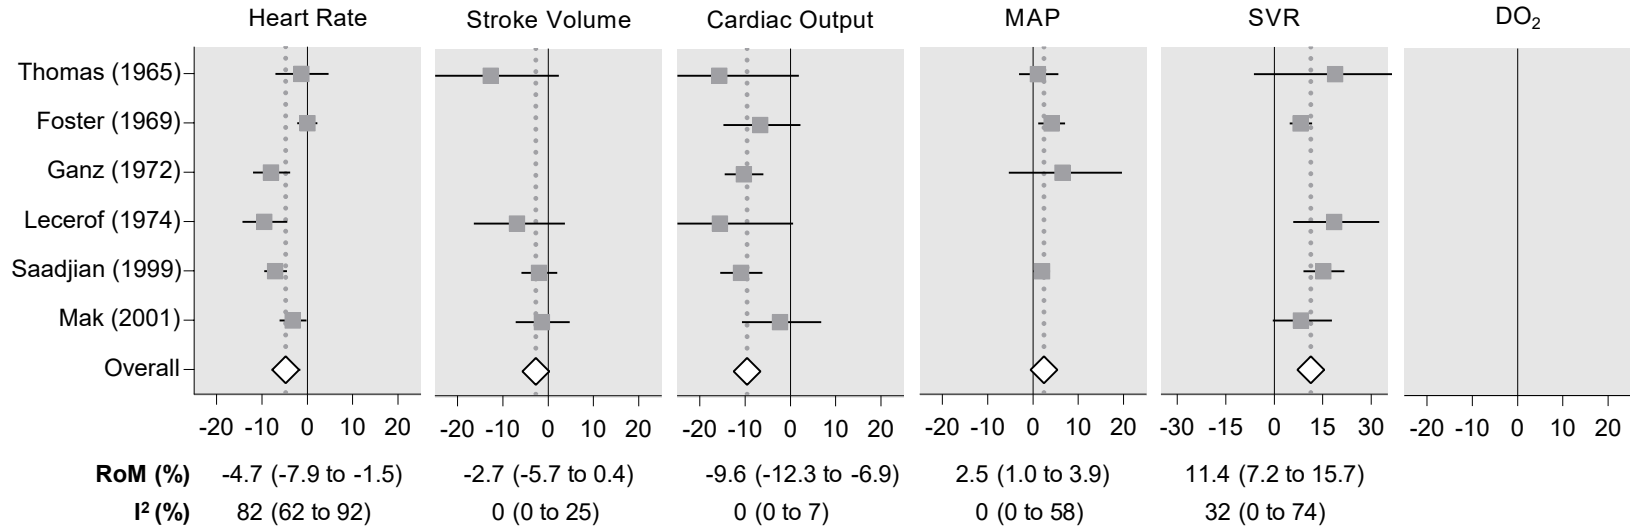

# Heart Failure

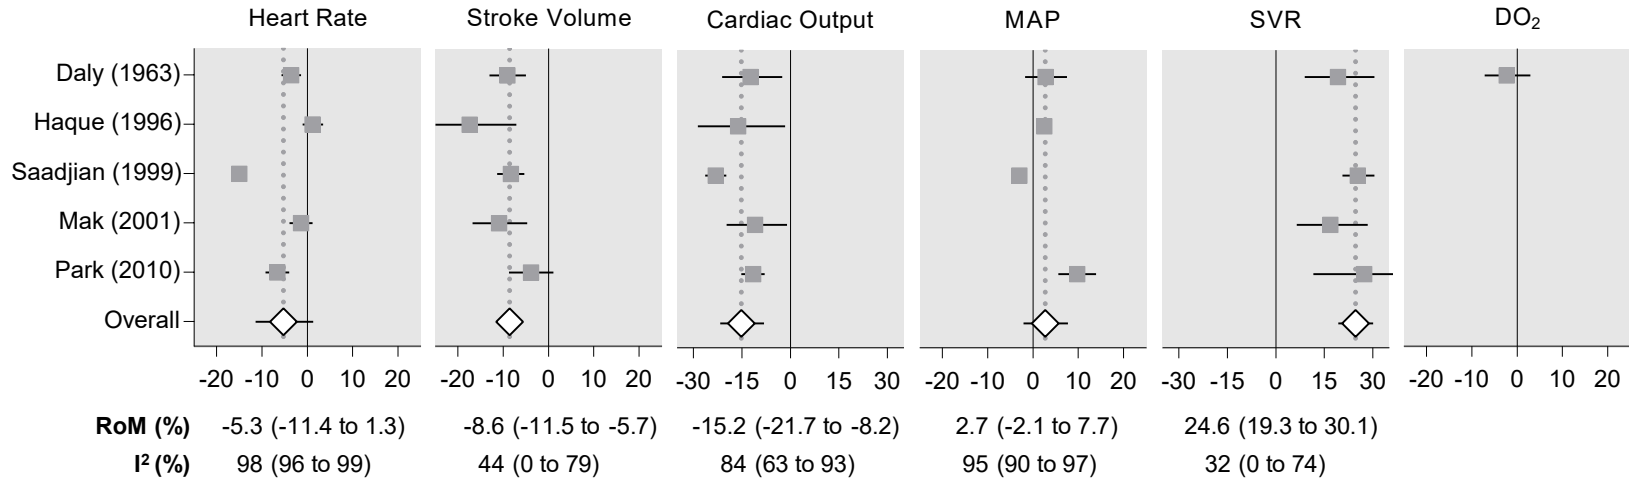

# Coronary Artery Bypass Grafting

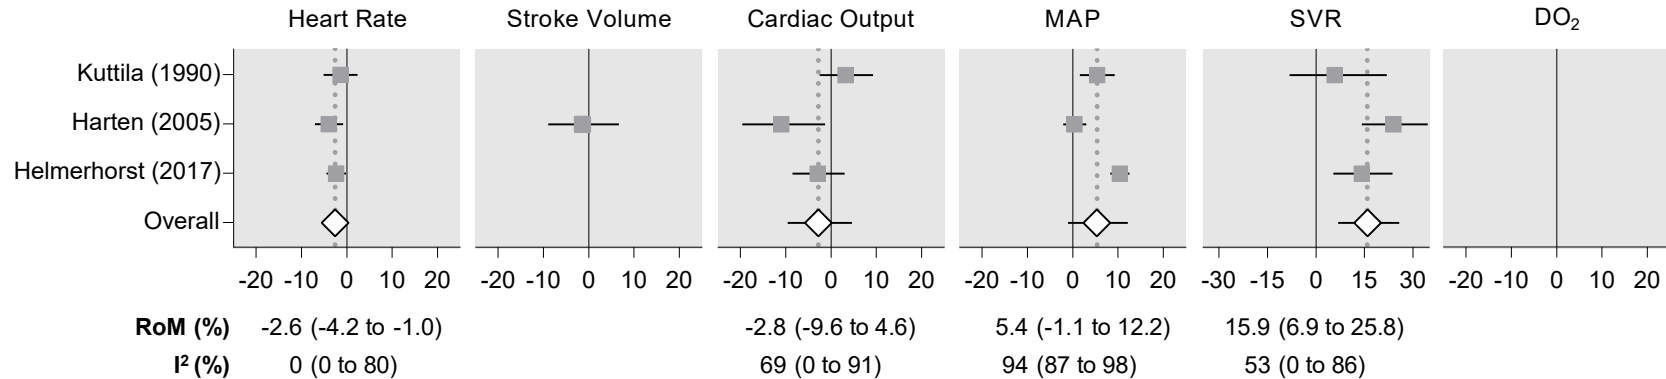

# Sepsis

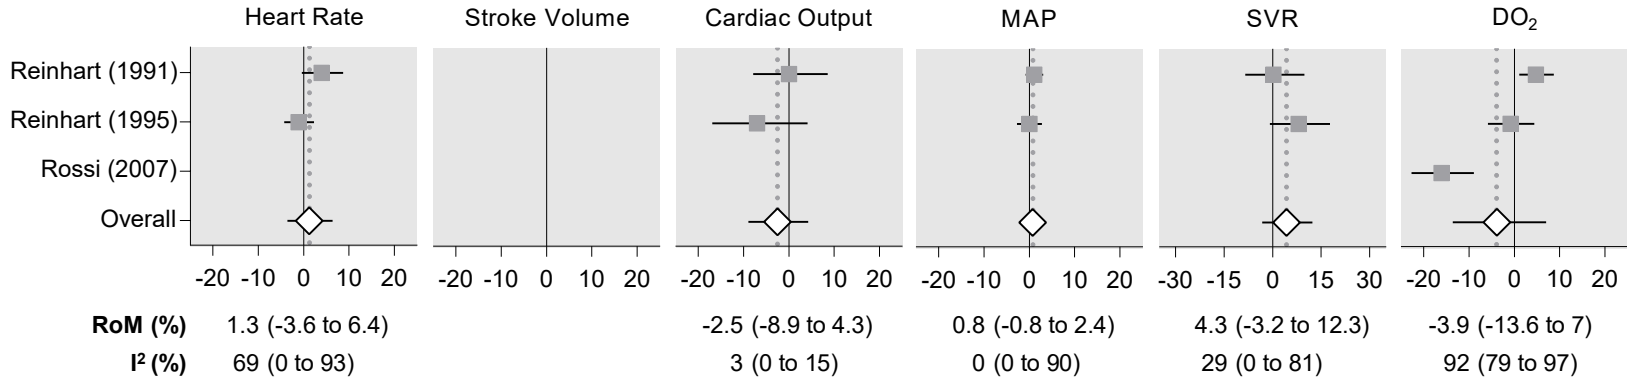

Supplement: MOESM4 [file 15489804]
